# **Volumetric assessment and longitudinal changes of brain structures in formalinized Beagle brains**

## **Beagle formalinized brains: volumetric and longitudinal changes**

**Francesca Del Signore<sup>1</sup>, Germain Arribarat<sup>2</sup>, Leonardo Della Salda<sup>1\*</sup>, Giovanni Mogenicato<sup>2</sup>, Alexandra Deviers<sup>2</sup>, Benjamin Cartiaux<sup>2</sup>, Massimo Vignoli<sup>1</sup>, Patrice Peran<sup>2\*\*</sup>, Francesco de Pasquale<sup>1\*\*</sup>**

<sup>1</sup> **Veterinary Faculty, University of Teramo, Teramo, Italy**

<sup>2</sup>**ToNIC Toulouse Neuroimaging Center UMR1214 - Inserm/UPS, Toulouse, France**

**\* Corresponding author**

**Email: [ldellasalda@unite.it](mailto:ldellasalda@unite.it) (LDS)**

**\*\* The authors contributed equally**

## 25 **Abstract**

26 High field MRI represents an advanced technique both for diagnostic and research purposes on animal  
27 models such as the Beagle dog. The increasing interest in non-invasive neuroscience, aging, and  
28 neuropathological research led to a need of reference values (in terms of volumetric assessment) for  
29 the typical brain structures involved and, nowadays, several canine brain MRI atlases have been  
30 provided. Since no reports are available regarding the measurements reproducibility and few  
31 information are available about formalin fixation effect on brain structures when applied to MRI  
32 segmentation, we assessed the segmentation variability of selected structures as a function of the  
33 operator (two operators segmented the same data) and their intrinsic variability within a sample of 11  
34 Beagle dogs (9 females and 2 males,  $1.6 \pm 0.2$  years). Then, we analyzed for one further Beagle dog  
35 (2 years old) the longitudinal changes in the brain segmentations of these structures corresponding  
36 four conditions: *in vivo*, *post mortem* (after euthanasia), *ex vivo* (brain extracted and studied after 1  
37 month in formalin and after 11 months); all the MRI images were collected with a 3 T MRI scanner.  
38 Our findings suggest that the segmentation procedure can be considered overall reproducible since  
39 only slight statistical differences were detected, apart from the ventricles.

40 Furthermore, in the *post mortem/ ex vivo* comparison, the majority of the structures showed a higher  
41 contrast leading to more reproducible segmentations across operators and a net increase of volume of  
42 the studied structures; this could be justified by the intrinsic relaxation time changes observed as a  
43 consequence of formalin fixation, that led to an improvement of brain structures visualization and  
44 then segmentation.

45 To conclude, MRI based segmentation seems to be a useful and accurate tool that allows longitudinal  
46 studies, especially when applied to formalin fixed brains.

47

48

49

## 50 **Introduction**

51

52 High field MRI, thanks to its high SNR and short acquisition time, represents an advanced technique  
53 both for diagnostic and research purposes on animal models such as the dog [1,2]. This model offers  
54 several advantages over more standard rodent and primate ones as testified by the growing literature  
55 on neurocognitive, aging, and clinical applications [3]. Neurocognitively, the canine shares similar  
56 behavioral/emotional responses with humans, e.g. in linking learning, memory, and other cognitive  
57 functions. These convergent sociocognitive skills places the dog in a unique position to increase our  
58 understanding of sociocognitive in humans [4]. Being gyrencephalic, the dog brain, as compared to  
59 rodent and avian, it represents a better experimental model for several disorders, e.g. gliomas and  
60 aging [5–7]. Among domestic canines, the Beagle is the breed most commonly used in laboratories,  
61 thanks to its moderate size, docile nature, and strong immunity [8–10]. Such increasing interest in  
62 non-invasive neuroscience, aging, and neuropathological research led to a need of reference values  
63 (in terms of volumetric assessment) for the typical brain structures involved. To this aim, recent  
64 studies developed a standard canine brain atlas to provide a common spatial referencing and  
65 architectonic-based cortical segmentation of coregistered data [4]. Similarly, a stereotactic cortical  
66 atlas for the mesaticephalic canine brain has been recently developed for functional and structural  
67 MRI analyses [3]. In general, the currently available atlases, see for example [11–13], are affected by  
68 some limitations such as the small number of subjects used [11], the acquisition of non-isovolumetric  
69 data [13], the use of dogs non neurologically/clinically healthy [12] and the mixing of different breeds  
70 included in the sample [3]. To overcome the uncertainty related to the breed variability, very recently  
71 Liu et al. realized a specific atlas for the Beagle breed, which is the most used breed in this kind of  
72 studies [14]. However, all these studies were performed on alive subjects, apart from the work of  
73 Datta and colleagues, 2012, where formalin-fixed brains (*ex vivo*) were segmented to obtain a  
74 diffeomorphic brain atlas of mesaticephalic dogs coregistered onto an *in vivo* template [11].

75 Nevertheless, in this study, some important aspects such as the reproducibility of the measurements  
76 across different operators and the volumetric variation from *in vivo* to *ex vivo* phases were not  
77 assessed [11]. Such a relationship is very important since MRI findings can be linked and often  
78 validated through histopathology. This can be very time-consuming and challenging for several  
79 reasons, e.g. the inaccurate correspondence MRI-anatomical sections (due to different slice thickness  
80 and orientations) [15]. For this reason, when whole-brain histopathology is not feasible, *in vivo* and  
81 *post mortem* MRI can be used as a guide for limited pathological sampling [16–18]. Similarly, in  
82 forensic radiology, *post mortem* MRI has been recognized as a supplementary tool to address specific  
83 forensic questions [19- 21]. However, *ex-vivo* MRI can be very challenging. First, after death, the  
84 brain undergoes several changes, e.g. microbial degradation, autolysis, breakdown of cell  
85 membranes, and stochastic diffusion of molecules. Second, also the chemical fixation, needed to  
86 ensure the longitudinal stability of the macromolecular structure, might affect the tissue properties.  
87 Therefore, due to death and fixation, a series of artifacts and changes of tissue properties are expected.  
88 This will affect MR imaging and the conclusions based on MRI measurements in fixed tissue may  
89 not reflect directly the *in-vivo* environment [21]. For example, it has previously been reported that  
90 formalin fixation causes a tissue shrinkage that not be homogeneous among the various brain  
91 structures, and it might vary over time [22]. However, these aspects are still under debate and the  
92 literature is scares. For this reason, in this study, we analyzed the effect of long-term fixation (12  
93 months) on brain structures in a sample of 11 Beagle dogs. We manually segmented a set of brain  
94 structures, e.g. Globus Pallidus, Caudate, and Substantia Nigra, whose volumetric changes have been  
95 reported to correlate with many neurodegenerative disorders such as Parkinson's [23]. First, we  
96 assessed the variability of the extracted volumes as a function of the operator (two operators  
97 segmented the same data) and their intrinsic variability within the sample. Then, we analyzed for one  
98 further dog the longitudinal changes in the brain segmentations of these structures corresponding four  
99 conditions: *in vivo*, *post mortem* (after euthanasia), *ex vivo* (brain extracted and studied after 1 month

100 in formalin and after 11 months). In this way, the last condition overlaps with the previous sample of  
101 11 dogs.

102 The estimated volumetric data can represent an important reference for future studies and the  
103 longitudinal effects observed might shed light on which structures are segmented more accurately as  
104 a function of time spent in formalin. As far as we know, this is the first study reporting brain structures  
105 in formalinized dogs and their longitudinal changes.

106

## 107 **Materials and Methods**

108

### 109 **Animals**

110 A sample of 12 healthy Beagle dogs were evaluated in two studies. In the first study, a group of 11  
111 dogs (9 females and 2 males,  $1.6 \pm 0.2$  years) was used for the evaluation of the effect of long-term  
112 fixation on MRI properties of the brain. In this context, a single MRI scan was performed on isolated  
113 heads that remained fixed for 11 months. Dogs originated from a laboratory in which they completed  
114 their research time and were euthanized for teaching purposes (i.e. preparation of veterinary  
115 anatomical teaching materials: MRI brain atlas and embalmed cadavers for dissection).

116 In the second study, one dog (male, 2 years) was used for the longitudinal evaluation of the effect of  
117 death and fixation on MRI properties of the brain. This dog underwent 4 MRI exams: 1 *in vivo*, 1  
118 *post-mortem* performed just after euthanasia, and 2 *ex vivo* performed on the brain removed from the  
119 skull after 1 (*ex\_vivo\_1*) and 12 months of fixation (*ex\_vivo\_12*). While the terms *post-mortem* and  
120 *ex vivo* are normally interchangeable, in this study, they refer to two different conditions which are  
121 evaluation of the brain confined by the skull just after death (*post-mortem*) and evaluation of formalin-  
122 fixed brains (*ex vivo*, either isolated or confined by the skull).

123 The experimental procedures related to the preparation of veterinary anatomical teaching materials  
124 were approved by the Animal Ethics Committee of the National Veterinary School of Toulouse with  
125 authorization n° 21559-2019071917392588. Dogs were euthanized by an IV injection of  $\geq 100$  mg/kg  
126 sodium pentobarbital while they were deeply anesthetized (anesthetic protocol: IV injection of  
127 butorphanol (0,4 mg/kg), medetomidine (20  $\mu$ g/kg), and diazepam (0,2 mg/kg)). Heparin sodium  
128 (1000 IU) was injected by IV route 5 minutes before euthanasia to optimize post-mortem perfusion  
129 of fixative solution.

130

131

## 132 **Fixation protocol**

133 Dogs were anesthetized to acquire in vivo MR images (not used in the present study) after which they  
134 were euthanized, and their heads were fixed according to the procedure described above. Heads were  
135 then stored in containers filled with 10% formalin solution and were scanned after 11 months of  
136 fixation.

137 For the dog in the second study, in vivo MRI scans and euthanasia were carried out under anesthesia  
138 with the protocol described above. The post-mortem MRI examination was performed just after  
139 euthanasia and once this acquisition was completed, the cadaver was transferred to a special room for  
140 fixation. The head was then separated from the body to be perfused via the common carotid arteries  
141 with a rinsing solution (NaCl, flow rate: 15 mL/minute, perfusion time: 5 minutes) and a fixative  
142 solution (10% formalin solution, 15 mL/minute, perfusion time: 5 minutes). The head was stored in  
143 a container filled with 10% formalin solution. After one month of fixation, the brain was removed  
144 from the skull for an ex vivo MRI acquisition. An additional ex vivo MRI examination of the brain  
145 was performed after 11 months of fixation.

146

## 147 **MRI acquisition**

148 MRI examinations were performed at the Institute for Brain Sciences of Toulouse using a high field  
149 3.0 Tesla magnet (Philips ACHIEVA dStream) at the Inserm/UPS UMR1214 ToNIC  
150 Technical Platform, and a, 8-channel, human elbow coil (serving as dog head coil) for signal  
151 reception. The Ex-vivo examinations were performed with a 1-channel solenoid antenna. To  
152 guarantee a homogeneous and accurate signal, no acceleration or preparation factors were used. For  
153 the dog with longitudinal follow-up of the brain, the imaging protocol comprised of T1 and T2  
154 weighted images. The 3D whole-brain T1 and T2 weighted images were obtained in the sagittal plane.  
155 For T1 imaging (Fast Field Echo), the sequence parameters were the following: echo time/repetition  
156 time = 4.0/9.0 ms, flip angle = 8°. For T2 imaging (Spin Echo) the sequence parameters were the

157 following: echo time/repetition time = 266/2500 ms, flip angle = 90°. The spatial resolution  
158 parameters were the same for both acquisitions: pixel spacing  $0.5 \times 0.5 \text{ mm}^2$ , slice thickness  
159 = 0.5 mm, matrix size = 288x288, numbers of slices = 300, voxel size =  $0.5 \times 0.5 \times 0.5 \text{ mm}^3$ . The  
160 total duration of the imaging protocol was 60 min.

161 These sequences were used for the 4 MRI examinations of the follow-up. Twenty-four hours before  
162 the ex vivo MRI scans, the brain was rinsed with water and then submerged in a 0,9% saline solution  
163 (NaCl). Just before acquisition, the brain was put in an MRI-compatible container (a plastic container  
164 with a leakproof screw cap) totally filled with saline solution, the container was then placed in the  
165 elbow coil.

166 Twenty-four hours before their acquisition, the 11 fixed heads were rinsed with water and then  
167 submerged in NaCl. For the acquisition, they were dried, wrapped up in hermetic packages, held  
168 horizontally on the MRI table, and placed in the human elbow coil. The imaging protocol comprised  
169 T1-weighted images (repetition time TR = 8.5 ms; echo time TE = 3.8 ms; voxel size  $0.5 \times 0.5 \times 0.5$   
170 mm, matrix 288x288x300) and T2-weighted images (repetition time TR = 265.71 ms; echo time TE  
171 = 2500 ms; voxel size  $0.5 \times 0.5 \times 0.5 \text{ mm}$ , matrix 288x288x300).

172

## 173 **Assessment of inter-operator reproducibility**

174 Two veterinarians experienced in canine brain structure segmentation operators (O1- and O2  
175 respectively) blindly segmented the following structures: Ventricles (from T1 scans) and Caudate  
176 Nucleus, Hippocampus, Substantia Nigra, Putamen, Globus Pallidus, Lateral and Medial Geniculate  
177 Nucleus (from T2 scans), dividing the measurements in left and right parts on the group of 11 dogs  
178 and the longitudinal study. The choice to perform the segmentations either in T1 or T2 was driven by  
179 the contrast observed in the various structures.

180 As far as it regards the analysis on the measurements collected on the group of 11 dogs, on each  
181 structure mean (M) and standard deviation (SD) was evaluated. Based on them, to assess the intra-



182 operator reproducibility, the percentage volumes were computed as  $CV = SD/M$ . Finally, the  
183 statistical comparison between the two operators was provided by a t-test.

184

## 185 **Longitudinal study**

186 For the second part of the study, the two operators performed the same segmentations of the previous  
187 phase, and the percentage (%) variations of the volumes between the different scanning phases were  
188 estimated and compared between the two operators. We considered the following conditions: *in vivo*  
189 *vs post mortem* (defined as  $(post\ mortem - in\ vivo)/in\ vivo * 100$ ), the *post mortem vs ex vivo* – 1-  
190 month volumes (expressed as  $(ex\_vivo\_1 - post\ mortem)/post\ mortem * 100$ ), the *in vivo vs ex vivo*  
191 1 month volumes (expressed as  $(ex\_vivo\_1 - in\ vivo)/in\ vivo * 100$ ) and, finally, *ex vivo* 1 month vs  
192 *ex vivo* 12 months (expressed as  $((ex\_vivo\_12 - ex\_vivo\_1)/ex\_vivo\_1 * 100)$ ).

193 ITK SNAP software (version 3.8.0, 2019) was used as a tool to collect the segmentation and statistical  
194 analysis was performed with MATLAB; the statistical significance was defined as an alpha level of  
195 alpha = 0.05.

196

197 **Results**

198

199 **Brain segmentation after 12 months in formalin**

200 The segmentations obtained from two operators after 12 months in formalin are reported in

201 Table 1.

202

203 **Table 1. Summary table for the 11 dogs.**

|                        |             | <b>O1</b>               |            |            | <b>O2</b>               |            |            |                 |
|------------------------|-------------|-------------------------|------------|------------|-------------------------|------------|------------|-----------------|
|                        |             | <i>Mean</i>             | <i>ST</i>  | <i>CV%</i> | <i>Mean</i>             | <i>ST</i>  |            | <i>p value</i>  |
|                        |             | <i>(mm<sup>3</sup>)</i> | <i>DEV</i> |            | <i>(mm<sup>3</sup>)</i> | <i>DEV</i> | <i>CV%</i> |                 |
| <b>Ventricles</b>      | <b>T1</b>   | 1059.27                 | 240.87     | 0.22       | 674.9                   | 197.52     | 0.25       | <b>&lt;0.05</b> |
| <b>Caudate</b>         | <b>T2 L</b> | 576.09                  | 56.82      | 0.09       | 600.36                  | 71.69      | 0.11       | 0.38            |
| <b>Caudate</b>         | <b>T2 R</b> | 576.77                  | 58.46      | 0.10       | 596.72                  | 64.26      | 0.10       | 0.31            |
| <b>Hippocampus</b>     | <b>T2 L</b> | 588.06                  | 54.16      | 0.09       | 635.3                   | 62.15      | 0.09       | 0.07            |
| <b>Hippocampus</b>     | <b>T2 R</b> | 588.61                  | 35.57      | 0.06       | 620.04                  | 48.87      | 0.07       | 0.10            |
| <b>Sub Nigra</b>       | <b>T2 L</b> | 48                      | 11.04      | 0.22       | 50                      | 9.73       | 0.19       | 0.64            |
| <b>Sub Nigra</b>       | <b>T2 R</b> | 54.19                   | 9.73       | 0.17       | 57.9                    | 9.90       | 0.17       | 0.37            |
| <b>Lat Geniculate</b>  | <b>T2 L</b> | 63.55                   | 4.78       | 0.07       | 71.2                    | 14.83      | 0.20       | 0.11            |
| <b>Lat Geniculate</b>  | <b>T2 R</b> | 67.26                   | 6.92       | 0.10       | 74.68                   | 11.98      | 0.16       | 0.09            |
| <b>Med Geniculate</b>  | <b>T2 L</b> | 78.19                   | 12.85      | 0.16       | 88.64                   | 18.22      | 0.20       | 0.13            |
| <b>Med Geniculate</b>  | <b>T2 R</b> | 85.50                   | 12.45      | 0.14       | 93.24                   | 14.27      | 0.15       | 0.19            |
| <b>Putamen</b>         | <b>T2 L</b> | 76.14                   | 11.88      | 0.15       | 77.25                   | 13.46      | 0.17       | 0.84            |
| <b>Putamen</b>         | <b>T2 R</b> | 69.96                   | 9.50       | 0.13       | 71.65                   | 13.93      | 0.19       | 0.74            |
| <b>Globus Pallidus</b> | <b>T2 L</b> | 55.06                   | 9.10       | 0.16       | 60.18                   | 11.36      | 0.18       | 0.25            |
| <b>Globus Pallidus</b> | <b>T2 R</b> | 58.02                   | 8.96       | 0.15       | 61.79                   | 11.32      | 0.18       | 0.39            |

204 Estimated volumes of the considered structures. The obtained measurements reported for operator 1  
205 and 2 (O1/O2), expressed the volume averaged across the considered subjects, their standard  
206 deviation and CV%. Within this sample the only statistically significant difference between the  
207 operators is observed for the ventricles (red).

208

209 For each operator (O1/O2), we report the mean and standard deviations of the volumes and  
210 their percentage variations expressed as CV%. The ventricles expressed the highest variability within  
211 the same operator (22% for O1 and 25% for O2), followed by the Substantia Nigra and Geniculate  
212 (around 20%) while the remaining structures showed a variability around 15% or less (see Fig 1).

213

214 **Fig 1. Segmentation stability across operators.**

215 The percentage variability of each structure operator O1 (solid line) and O2 (dotted line). It can be  
216 noticed that the lowest variability, except for the ventricles, was observed for both operators for the  
217 largest and more defined brain structures, thus suggesting that the MRI volume of the segmented  
218 structure is influenced by the actual size and its intrinsic contrast with the surrounding parenchyma.

219

220 The spatial topography of these variations is shown in Fig 2, where the % CV, averaged across  
221 operators, is overlaid on a T1w image of a representative dog.

222

223 **Fig 2. The spatial topography of the % CV of the considered structures.** The % CV averaged  
224 across operators overlaid on T1w images of a representative dog.

225

226 As it can be seen in Table 1 and Fig 3, where the whisker plots of the analyzed structures are  
227 reported, apart from the ventricles ( $p < 0.01$  – dotted box in Fig 3), a t-test evidenced no statistically  
228 significant differences among the two users.

229

230 **Fig 3. Data distribution of the segmented structures.** Whisker plot for the distribution of the  
231 segmented volumes from the two operators O1 (black) and O2 (white).

232 A) The set Ventricles, Caudate, and Hippocampus. Only the ventricles resulted statistically different  
233 between the two operators (dotted box).

234 B) The set Substantia Nigra, Lateral and Medial Geniculate, Putamen and Globus Pallidus. In this set  
235 no statistical difference is observed.

236

237 This seems to suggest that the segmentation of the considered structures is quite stable and  
238 reproducible across operators. The observed difference in the ventricles might be ascribed to the  
239 difficulty to identify their exact border with cerebrospinal fluid (CSF). To summarize, these findings  
240 suggest that manual segmentation provides globally reproducible measurements. Further, we  
241 observed some structure variability across dogs, that cannot be ascribed to operators' skills. Such  
242 intrinsic structure variability shows that some structures are more stable than others. Of note, larger  
243 structures such as Caudate and Hippocampus showed the lowest values of dispersion, while smaller  
244 structures such as Medial and Lateral Geniculate were characterized by higher values of dispersion.  
245 This might be justified since both operators experienced higher difficulty to segment the smaller  
246 structures due to their relatively poor signal contrast.

## 247 **A longitudinal study on brain structures**

248 In this part of the study, for a representative dog, we assessed the longitudinal changes of  
249 segmentations performed *in vivo*, *post mortem*, and *ex vivo\_1* (after one month in formalin) and *ex*  
250 *vivo\_12* (after 12 months in formalin).

251 First, we observed that both T1w and T2w images showed a change of signal contrast between the  
252 *post mortem* and *ex-vivo* data (Fig 4).

253

254 **Fig 4. T1 and T2 progressive change of contrast.** Panels A-D: T<sub>w</sub> transverse section of the studied  
255 dog in the four different phases of the experiment, respectively *in vivo* (A), *post mortem* (B), *ex vivo*  
256 1 month (C), and *ex vivo* 12 months (D). *In vivo* and *post mortem* grey and the white matter appeared  
257 respectively hypointense and hyperintense, on *ex vivo* images the contrast appeared exactly the  
258 opposite, with grey and white matter respectively hyperintense and hypointense. The solid arrows  
259 point at the Substantia Nigra and it can be observed the progressive increase of contrast. Panels E-H  
260 represent the same four phases from T<sub>2w</sub> images. In this case, rather than an inversion of the normal  
261 contrast, it has been observed a strong decrease of intensity of the white matter in the *ex vivo* phase,  
262 thus leading to an increased definition of the contours of the various structures.

263

264 Specifically, on T<sub>1w</sub> images, while *in vivo* (A) and *post mortem* (B) grey and white matter  
265 (GM and WM) appeared respectively hypointense and hyperintense, on *ex vivo* images (C-D) the  
266 contrast seems the opposite, with GM and WM matter respectively hyperintense and hypointense.  
267 This is evident for the Substantia Nigra, (white arrow in the figure). It can be observed that while in  
268 panels A and B this structure is barely visible, in panels C (*ex vivo\_1*) and D (*ex vivo\_12*) the contrast  
269 increased with borders of the structure more evident. On T<sub>2w</sub> images, it is observed a strong decrease  
270 in the white matter in both *ex vivo* phases, leading to an increased definition of the contours of the  
271 various structures. This is most evident for the smallest structures (e.g. Putamen or Globus Pallidus),  
272 whose borders were difficult to define by both operators *in vivo* and *post mortem* phases (Fig 4 E-H).

273 The volumetric percentage variations (see Materials and Methods) across time of the considered  
274 structures are reported in Fig 5.

275

276 **Fig 5. Longitudinal variations.** A) Volume variation between the *in vivo* and *post mortem* phases.  
277 Volume variations were obtained for O1 (solid), O2 (dashed), and the mean trend (gray). It can be  
278 observed that the volume variation is always lower than 20%. The trend is variable between the two  
279 operators. This aspect may be justified by the difficulty to clearly distinguish the exact borders of the  
280 structures in the *vivo* phase.

281 B) Volume variation between the *post mortem* and *ex\_vivo\_1* (after 1 month) phases. Volume  
282 variations were obtained on each structure for O1 (solid), O2 (dashed), and the mean trend (gray). It  
283 can be noted that the agreement between the two operators is higher than in the previous phase, with  
284 most structures experiencing an increase in volume from the *post mortem* to *ex vivo* phase. This is  
285 particularly interesting since the shift of the contrast after the time in formalin qualitatively seems to  
286 improve the visualization of the smallest structures.

287 C) Volume variation between the *in vivo* and *ex\_vivo\_1* phases. It can be noted that also in this case  
288 the operators agree and a trend similar to the previous figure is observed across the structures, i.e.  
289 most of the smallest structures appeared more clearly identifiable, thus justifying an increase of the  
290 volume.

291 D) Volume variation between the *ex\_vivo\_1* and *ex\_vivo\_12* phases. It can be easily observed that  
292 the volume variation is relatively low between the two phases, with an overall agreement from both  
293 operators, thus suggesting that the time spent in formalin does not significantly influence the volume  
294 variation.

295

296

297

298

299 As far as it regards the across-operator variability of the segmentations, also in this case, they  
300 seem reproducible in the various phases, i.e. the % variation of the volumes globally follows a similar  
301 trend for the two operators. Specifically, for the *in vivo/ post mortem* comparison (Fig 5A), the  
302 volumetric variation observed in the various structures is close to 12%, fluctuating at most around  
303 20%, and thus can be considered low. Notably, in some structures such as the Lateral and Medial  
304 Geniculate nucleus, the volume increased by 18-20%. In this comparison (*in vivo* vs *post mortem*),  
305 especially for the *in vivo* images, both operators experienced some difficulties to delineate the borders  
306 of the investigated structures. They reported that this was independent of the structures' dimension,  
307 i.e. it applied also to the largest structures. This applies to the *in vivo* phase while in the *post mortem/*  
308 *ex vivo* comparison, the majority of the structures showed a higher contrast leading to more  
309 reproducible segmentations across operators, the highest observed variability ranging around 10%  
310 (Fig 5B-D). However, we also observed for some structures, a large increase in volume. This was not  
311 expected since the formalin fixations are reported to lead to shrinking and reduced tissue volumes  
312 (24). This effect was particularly evident for Substantia Nigra (average increase of around 70% Fig  
313 5B, C), followed by Globus Pallidus (around 30%) and Geniculate (around 20%). In general, for both  
314 *ex vivo* phases, all the operators described an increased contrast to detect the borders of the various  
315 structures, and the smallest structures were described to be sensitively easier to be segmented.  
316 Considering the previous findings, this suggests that the increase of contrast seems to be ascribed to  
317 the *ex-vivo* condition and thus the effect of fixation. Now, to study if this change remains stable over  
318 time, we compared the two *ex vivo* conditions (*ex\_vivo\_1* and *ex\_vivo\_12*). As it can be seen in Fig  
319 5D, the highest changes fluctuate around 20%. This suggests that the increased time spent in formalin  
320 did not influence significantly the volumes of the various structures. Basically, in this period the  
321 structures' volumes remained stable. This is an important finding suggesting that the segmentation  
322 can be performed even after a significant amount of time from the formalin fixation. In order to  
323 understand if these volume changes were induced by an overall shrinkage or inflation of the brain,  
324 we performed the coregistration of the data acquired at the different time points.

325 As an example, in Fig 6, we report the borders of the brain extracted (for a representative slice) from  
326 *in-vivo* data overlaid to the T1w images obtained *ex-vivo* (central panel).

327

328 **Fig 6. Data coregistration.** T1w *in vivo* data are used as the reference to coregister the *ex-vivo* data  
329 with a 6-parameter coregistration approach (no scaling included). As an example, a representative  
330 slice is reported (A). The *in vivo* brain contours are overlaid to the *ex-vivo* data after the coregistration  
331 (B). It can be noted a good agreement. Analogously, the *in-vivo* brain contours overlaid on the *ex vivo*  
332 12 months show that the rigid coregistration successfully aligned the data (C). Since no scaling was  
333 involved in the data transformation, this suggests that the brain did not experience any significant  
334 inflation/shrinkage.

335

336 It can be noted that a rigid co-registration with 6 parameters, thus excluding any scaling factor,  
337 was able to coregister the brain successfully. Moreover, as it can be noted in Fig 6 (left panel), the  
338 sample applies to the coregistration of the *ex-vivo* data after 12 months. The fact that no scaling factor  
339 was needed to coregister the data, seems to suggest that the brain did not experiment with any  
340 significant inflation/deflation over time. Therefore, the changes observed in the volumes were likely  
341 due to a change in the signal contrast.

342 So far, the two samples of dogs have been treated separately. However, an interesting point would be  
343 if the longitudinal changes observed on a single dog hold also for the sample of 11 dogs. To address  
344 this aspect, in a future study we will perform the same longitudinal study on a sample of dogs.  
345 However, with the data available at this stage, we tried to assess if there were statistical differences  
346 between the volumes obtained from the single dog and the 11-dog sample. To this aim, we considered  
347 the distribution of the volumes, structure by structure, obtained from the sample and we tested  
348 whether the volumes obtained from the single dog (after 12 months in formalin) belonged to the same  
349 distribution or not, i.e. if they were statistically different.



350 As it can be seen in Table 2, where we report the 95% confidence intervals and the test outcomes,  
 351 apart from Ventricles, Right Hippocampus and Right Substantia Nigra all structures were not  
 352 statistically different.

353

354 **Table 2. Comparison between the measurements obtained on the group of 11 dogs (entire head)**  
 355 **after 12 months in formalin and the ones obtained on the single brain dog after 12 months in**  
 356 **formalin**

357

358

359

360

361

362

363

364

365

366

367

368

369

370

371

372

373

374

|                 |      | Mean_11 dogs | CI_11 dogs    | Mean_exvivo12 months | t test |
|-----------------|------|--------------|---------------|----------------------|--------|
| Ventricles      | T1   | 931.37       | 593.76-1251.2 | 1620.53              | *      |
| Caudate         | T2 L | 588.22       | 479.48-690.26 | 498,13               |        |
| Caudate         | T2 R | 586.75       | 472-681.36    | 496.75               |        |
| Hippocampus     | T2 L | 611.68       | 516.1-728.84  | 530.83               |        |
| Hippocampus     | T2 R | 611.95       | 533.14-690.48 | 524.04               | *      |
| Sub Nigra       | T2 L | 49.43        | 33.2-63.7     | 37.88                |        |
| Sub Nigra       | T2 R | 56.09        | 39.8-70.58    | 36.86                | *      |
| Lat Geniculate  | T2 L | 67.37        | 49.38-92.34   | 74.06                |        |
| Lat Geniculate  | T2 R | 70.97        | 53.84-89.58   | 68.00                |        |
| Med Geniculate  | T2 L | 83.41        | 54.88-112.1   | 65.03                |        |
| Med Geniculate  | T2 R | 89.37        | 63.14-109.16  | 70.11                |        |
| Putamen         | T2 L | 76.70        | 58.3-95.64    | 67.76                |        |
| Putamen         | T2 R | 70.81        | 51.62-912     | 69.14                |        |
| Globus Pallidus | T2 L | 57.62        | 41.34-73.86   | 56.49                |        |
| Globus Pallidus | T2 R | 59.90        | 36.72-72.48   | 57.63                |        |

375 Mean values between the operators are reported for each structure for both the group of the 11 dogs  
376 and the single brain dog after 12 months in formalin. A t-test revealed that only for the Ventricles,  
377 Hippocampus right and Sub Nigra R a significant difference was obtained (marked as \*) between  
378 the two distributions.

379

380 The volumes obtained from the single dog, after 12 months in formalin, seem to be consistent  
381 with the volumes obtained from the 11 dogs' sample. The mast majority, namely 80% of the  
382 structures, considered for the longitudinal study, belonged to the same distribution of the 11 dogs.  
383 This suggests that the considerations on the longitudinal changes observed on a single dog might hold  
384 also for the larger sample. Although encouraging, this point needs to be validated with a larger sample  
385 in a future study.

386

387

## 388 **Discussion**

389

390 This work has been conceived with a dual purpose. First, we assessed the feasibility of brain  
391 segmentations on selected structures in the brain kept in formalin for one year, focusing on the  
392 reproducibility of the segmentations as a function of the operator and their intrinsic variability within  
393 the sample. This study was performed on a homogeneous sample of 11 dogs. Then, one dog (not part  
394 of the previous sample) was used for the longitudinal evaluation of the effect of death and fixation  
395 on MRI properties of the brain. We obtained that after one year in formalin the segmentations seem  
396 reliable and mostly reproducible across operators. Of note, we observed that the time spent in formalin  
397 increased the contrast for some specific structures, such as the Substantia Nigra.

398 The impact of Beagle cerebral models on MRI translational studies is currently increasing. For this  
399 reason, several groups are interested in characterizing brain structures. To this aim, in [11,13,14,25]  
400 canine MRI based atlases have been developed. However, at the current stage, these are either based  
401 on a heterogeneous group of dogs, i.e. a mixed breed sample [3], or on just Beagle dogs, but  
402 considering only WM, GM, and CSF, and not specific structures [14]. Further, while these atlases  
403 were obtained from alive dogs, in [11] a mixed-breed atlas was obtained by coregistering *in vivo* with  
404 *ex vivo* data. In this case, brains were extracted from the skull and fixed in 10% buffered formalin.  
405 Compared to these works, in our study, for the first time to our knowledge, selected brain structures  
406 have been segmented on brains fixed in formalin to provide their volumetric evaluation. This allows  
407 assessing the reproducibility of such structures, an aspect that has not been previously evaluated. This  
408 point is important since manual segmentation is still the more accurate approach, being automatic  
409 tools not yet available for these applications [26]. Our findings suggest that the segmentation  
410 procedure on this kind of data can be considered overall reproducible since only slight statistical  
411 differences were detected, apart from the ventricles. This could be due to the fact that ventricles are  
412 fluid filled structures, and they may not be clearly distinguished from the rest of brain CSF.

413 Furthermore, the fact that some structures are characterized by higher volume variations than others  
414 may rely on an intrinsic individual variability. This aspect is particularly interesting, since single  
415 structures may be the target of specific experiments, and to determine that there may be an intrinsic  
416 variability could be crucial, e.g. in disentangling a pathology/drug induced effect vs a physiological  
417 variation. Next to strictly experimental purposes, since the estimation of volumes can assist in the  
418 detection and monitoring of the progression of brain disease/damage, the accuracy and reproducibility  
419 of MRI segmentation are important also in the clinical field [27]. In fact, nowadays manual  
420 segmentation for brain structures or lesions is considered the gold standard in terms of precision, even  
421 if it may result in longer analysis times compared to a more “automatic” approach [28,29]. This is in  
422 line with [14,22], where the mentioned brain templates were obtained from manually segmented data.  
423 Compared to histopathological analyses, the MRI based segmentation of formalin fixed brains has  
424 several advantages. First, structural abnormalities can be assessed within the entire brain without  
425 altering the original structures. Second, the formalin fixation allows to analyze the data multiple times  
426 in any plane to focus on specific areas [19,30] by preserving the structure of the tissues. In fact, after  
427 death, the brain undergoes microbial degradation, autolysis, and breakdown of cell membranes. The  
428 chemical fixation tends to preserve the macromolecular structure providing the longitudinal stability  
429 required for extensive scanning times. Nevertheless, due to death and fixation, a series of artifacts  
430 and changes are expected. As far as it regards eventual longitudinal studies, it is known that the  
431 formalin fixation may alter the relaxation times. This is due to the induced tissue dehydration,  
432 crosslinking, and reduced transmembrane water exchange [30] that lead to a T1/T2 shortening. This  
433 results in a higher spatial resolution in terms of borders visualization, for technical details see for  
434 example [19,31]. This is in line with what we observed in the *ex vivo* phases, where both operators  
435 found an increase of the volumes, especially for the smallest structures, that were judged easier to be  
436 segmented. To support this interpretation, we carefully checked the brain volumes by co-registering  
437 the brains across the three phases. We obtained no significant changes. Therefore, this apparent  
438 increase of volume did not correspond to a real increase in the size of the structure but to an increase

439 of contrast in the structures' borders allowing a more accurate segmentation. Evidently, before  
440 fixation, the structures' volumes were under-estimated due to low contrast. This is in line with  
441 previous findings, see for example [32] where it was reported that the qualitative image evaluation  
442 significantly improved after fixation, and the structures segmentations were described to be easier  
443 than *in vivo* images.

444 Another effect of formalin fixation that has been reported in the literature is the tissue shrinkage  
445 which may not be homogeneous among the various brain structures, especially when MRI is  
446 performed after fixation, see [22]. For example, it has been observed that ventricles may experience  
447 filling or emptying according to pressures from the surrounding tissue, and shrinkage of surrounding  
448 tissue may not always be paired with an expansion of the ventricles [33] with those tissues  
449 experiencing a “positive formalin effect”, characterized by a swelling effect caused by the osmotic  
450 pressure of the formalin solution [34]. These aspects should be taken into proper considerations when  
451 volumetric evaluations are performed on brains in *post mortem* or *ex vivo* conditions. These effects  
452 may relate to the observed variability of the ventricles in our data.

453 Finally, according to our findings, the amount of time (12 months) spent in formalin seems not to  
454 influence the volumes of the structures: their percentage variation did not exceed 10%. This aspect is  
455 important since it suggests that the same brain can be potentially used for several studies, even after  
456 some time, without the risk of significant structural changes. This observation is consistent with data  
457 proposed by other studies since previous investigations on the relationship between MR volumetric  
458 measurements performed in-vivo and ex-vivo report that the brain structures remain relatively stable  
459 for 6 months post-mortem [35]. This applies also to human medicine where it has been reported that  
460 fixation leads to no significant leaching of iron in long term storage [36] and that WM components,  
461 including myelin, are all well preserved [37].

462

463 To summarize, based on our findings *post mortem* MRI based segmentation seems to be a useful and  
464 accurate tool that allows longitudinal studies. However, especially for the observed longitudinal  
465 variations, these findings need to be further validated on a larger sample.

466

## 467 **References**

- 468 1. Robertson I. Optimal Magnetic Resonance Imaging of the Brain. *Vet Radiol Ultrasound*.  
469 2011;52(s1):S15–22.
- 470 2. Konar M, Lang J. Pros and cons of low-field magnetic resonance imaging in veterinary  
471 practice. *Vet Radiol Ultrasound Off J Am Coll Vet Radiol Int Vet Radiol Assoc*. 2011 Apr;52(1  
472 Suppl 1):S5–14.
- 473 3. Johnson PJ, Luh W-M, Rivard BC, Graham KL, White A, FitzMaurice M, et al. Stereotactic  
474 Cortical Atlas of the Domestic Canine Brain. *Sci Rep*. 2020 Mar 16;10(1):4781.
- 475 4. Bunford N, Andics A, Kis A, Miklósi Á, Gácsi M. *Canis familiaris* As a Model for Non-  
476 Invasive Comparative Neuroscience. *Trends Neurosci*. 2017 Jul;40(7):438–52.
- 477 5. Head E. A canine model of human aging and Alzheimer’s disease. *Biochim Biophys Acta*.  
478 2013 Sep;1832(9):1384–9.
- 479 6. Gilmore KM, Greer KA. Why is the dog an ideal model for aging research? *Exp Gerontol*.  
480 2015 Nov;71:14–20.
- 481 7. Hubbard ME, Arnold S, Bin Zahid A, McPheeters M, Gerard O’Sullivan M, Tabaran A-F, et  
482 al. Naturally Occurring Canine Glioma as a Model for Novel Therapeutics. *Cancer Invest*.  
483 2018;36(8):415–23.
- 484 8. Aguirre GK, Komáromy AM, Cideciyan AV, Brainard DH, Aleman TS, Roman AJ, et al.  
485 Canine and Human Visual Cortex Intact and Responsive Despite Early Retinal Blindness from  
486 RPE65 Mutation. *PLoS Med*. 2007 Jun;4(6):e230.
- 487 9. Studzinski CM, Araujo JA, Milgram NW. The canine model of human cognitive aging and  
488 dementia: pharmacological validity of the model for assessment of human cognitive-enhancing  
489 drugs. *Prog Neuropsychopharmacol Biol Psychiatry*. 2005 Mar;29(3):489–98.
- 490 10. Wayne RK, vonHoldt BM. Evolutionary genomics of dog domestication. *Mamm Genome*  
491 *Off J Int Mamm Genome Soc*. 2012 Feb;23(1–2):3–18.

- 492 11. Datta R, Lee J, Duda J, Avants BB, Vite CH, Tseng B, et al. A digital atlas of the dog brain.  
493 PloS One. 2012;7(12):e52140.
- 494 12. Milne ME, Steward C, Firestone SM, Long SN, O'Brien TJ, Moffat BA. Development of  
495 representative magnetic resonance imaging-based atlases of the canine brain and evaluation of three  
496 methods for atlas-based segmentation. *Am J Vet Res*. 2016 Apr;77(4):395–403.
- 497 13. Nitzsche B, Boltze J, Ludewig E, Flegel T, Schmidt MJ, Seeger J, et al. A stereotaxic breed-  
498 averaged, symmetric T2w canine brain atlas including detailed morphological and volumetrical data  
499 sets. *NeuroImage*. 2019 Feb 15;187:93–103.
- 500 14. Liu X, Tian R, Zuo Z, Zhao H, Wu L, Zhuo Y, et al. A high-resolution MRI brain template  
501 for adult Beagle. *Magn Reson Imaging*. 2020 May;68:148–57.
- 502 15. Absinta M, Nair G, Filippi M, Ray-Chaudhury A, Reyes-Mantilla MI, Pardo CA, et al.  
503 Postmortem Magnetic Resonance Imaging to Guide the Pathological Cut: Individualized, 3D-  
504 Printed Cutting Boxes for Fixed Brains. *J Neuropathol Exp Neurol*. 2014 Aug;73(8):780–8.
- 505 16. Schmierer K, Scaravilli F, Barker GJ, Gordon R, MacManus DG, Miller DH. Stereotactic  
506 co-registration of magnetic resonance imaging and histopathology in post-mortem multiple  
507 sclerosis brain. *Neuropathol Appl Neurobiol*. 2003 Dec;29(6):596–601.
- 508 17. Bö L, Geurts JJG, Ravid R, Barkhof F. Magnetic resonance imaging as a tool to examine the  
509 neuropathology of multiple sclerosis. *Neuropathol Appl Neurobiol*. 2004 Apr;30(2):106–17.
- 510 18. Fisher E, Chang A, Fox RJ, Tkach JA, Svarovsky T, Nakamura K, et al. Imaging correlates  
511 of axonal swelling in chronic multiple sclerosis brains. *Ann Neurol*. 2007 Sep;62(3):219–28.
- 512 19. Boyko OB, Alston SR, Fuller GN, Hulette CM, Johnson GA, Burger PC. Utility of  
513 postmortem magnetic resonance imaging in clinical neuropathology. *Arch Pathol Lab Med*. 1994  
514 Mar;118(3):219–25.
- 515 20. Ruder TD, Thali MJ, Hatch GM. Essentials of forensic post-mortem MR imaging in adults.  
516 *Br J Radiol*. 2014 Apr;87(1036):20130567.
- 517 21. Cahill LS, Laliberté CL, Ellegood J, Spring S, Gleave JA, Eede MC van, et al. Preparation



- 518 of fixed mouse brains for MRI. *NeuroImage*. 2012 Apr 2;60(2):933–9.
- 519 22. Quester R, Schröder R. The shrinkage of the human brain stem during formalin fixation and  
520 embedding in paraffin. *J Neurosci Methods*. 1997 Jul 18;75(1):81–9.
- 521 23. Foffani G, Obeso JA. A Cortical Pathogenic Theory of Parkinson’s Disease. *Neuron*. 2018  
522 Sep 19;99(6):1116–28.
- 523 24. Hsu P-K, Huang H-C, Hsieh C-C, Hsu H-S, Wu Y-C, Huang M-H, et al. Effect of formalin  
524 fixation on tumor size determination in stage I non-small cell lung cancer. *Ann Thorac Surg*. 2007  
525 Dec;84(6):1825–9.
- 526 25. Johnson PJ, Luh W-M, Rivard BC, Graham KL, White A, FitzMaurice M, et al. Stereotactic  
527 Cortical Atlas of the Domestic Canine Brain. *Sci Rep*. 2020 Mar 16;10(1):4781.
- 528 26. Despotović I, Goossens B, Philips W. MRI segmentation of the human brain: challenges,  
529 methods, and applications. *Comput Math Methods Med*. 2015;2015:450341.
- 530 27. C V-A, A A-A, A S, Sk W. Reproducibility of Brain MRI Segmentation Algorithms:  
531 Empirical Comparison of Local MAP PSTAPLE, FreeSurfer, and FSL-FIRST. *J Neuroimaging Off*  
532 *J Am Soc Neuroimaging* [Internet]. 2018 Mar [cited 2021 Jul 14];28(2). Available from:  
533 <https://pubmed.ncbi.nlm.nih.gov/29134725/>
- 534 28. Devi CN, Chandrasekharan A, V.k. S, Alex ZC. Automatic segmentation of infant brain MR  
535 images: With special reference to myelinated white matter. *Biocybern Biomed Eng*. 2017 Jan  
536 1;37(1):143–58.
- 537 29. Morey RA, Petty CM, Xu Y, Hayes JP, Wagner HR, Lewis DV, et al. A comparison of  
538 automated segmentation and manual tracing for quantifying hippocampal and amygdala volumes.  
539 *NeuroImage*. 2009 Apr 15;45(3):855–66.
- 540 30. Pfefferbaum A, Sullivan EV, Adalsteinsson E, Garrick T, Harper C. Postmortem MR  
541 imaging of formalin-fixed human brain. *NeuroImage*. 2004 Apr;21(4):1585–95.
- 542 31. Schumann CM, Buonocore MH, Amaral DG. Magnetic resonance imaging of the post-  
543 mortem autistic brain. *J Autism Dev Disord*. 2001 Dec;31(6):561–8.

- 544 32. Oguz I, Yaxley R, Budin F, Hoogstoel M, Lee J, Maltbie E, et al. Comparison of Magnetic  
545 Resonance Imaging in Live vs. Post Mortem Rat Brains. PLOS ONE. 2013 Aug 13;8(8):e71027.
- 546 33. de Guzman AE, Wong MD, Gleave JA, Nieman BJ. Variations in post-perfusion immersion  
547 fixation and storage alter MRI measurements of mouse brain morphometry. NeuroImage. 2016 Nov  
548 15;142:687–95.
- 549 34. Grinberg LT, Amaro E, Teipel S, dos Santos DD, Pasqualucci CA, Leite REP, et al.  
550 Assessment of factors that confound MRI and neuropathological correlation of human postmortem  
551 brain tissue. Cell Tissue Bank. 2008 Jun 12;9(3):195.
- 552 35. Kotrotsou A, Schneider JA, Bennett DA, Leurgans SE, Dawe RJ, Boyle PA, et al.  
553 Neuropathologic Correlates of Regional Brain Volumes in a Community Cohort of Older Adults.  
554 Neurobiol Aging. 2015 Oct;36(10):2798–805.
- 555 36. Gellein K, Flaten TP, Erikson KM, Aschner M, Syversen T. Leaching of trace elements  
556 from biological tissue by formalin fixation. Biol Trace Elem Res. 2008 Mar;121(3):221–5.
- 557 37. Zemmoura I, Blanchard E, Raynal P-I, Rousselot-Denis C, Destrieux C, Velut S. How  
558 Klingler’s dissection permits exploration of brain structural connectivity? An electron microscopy  
559 study of human white matter. Brain Struct Funct. 2016 Jun;221(5):2477–86.
- 560  
561  
562  
563  
564  
565  
566  
567  
568  
569  
570  
571  
572

573

574

575

576

577

578

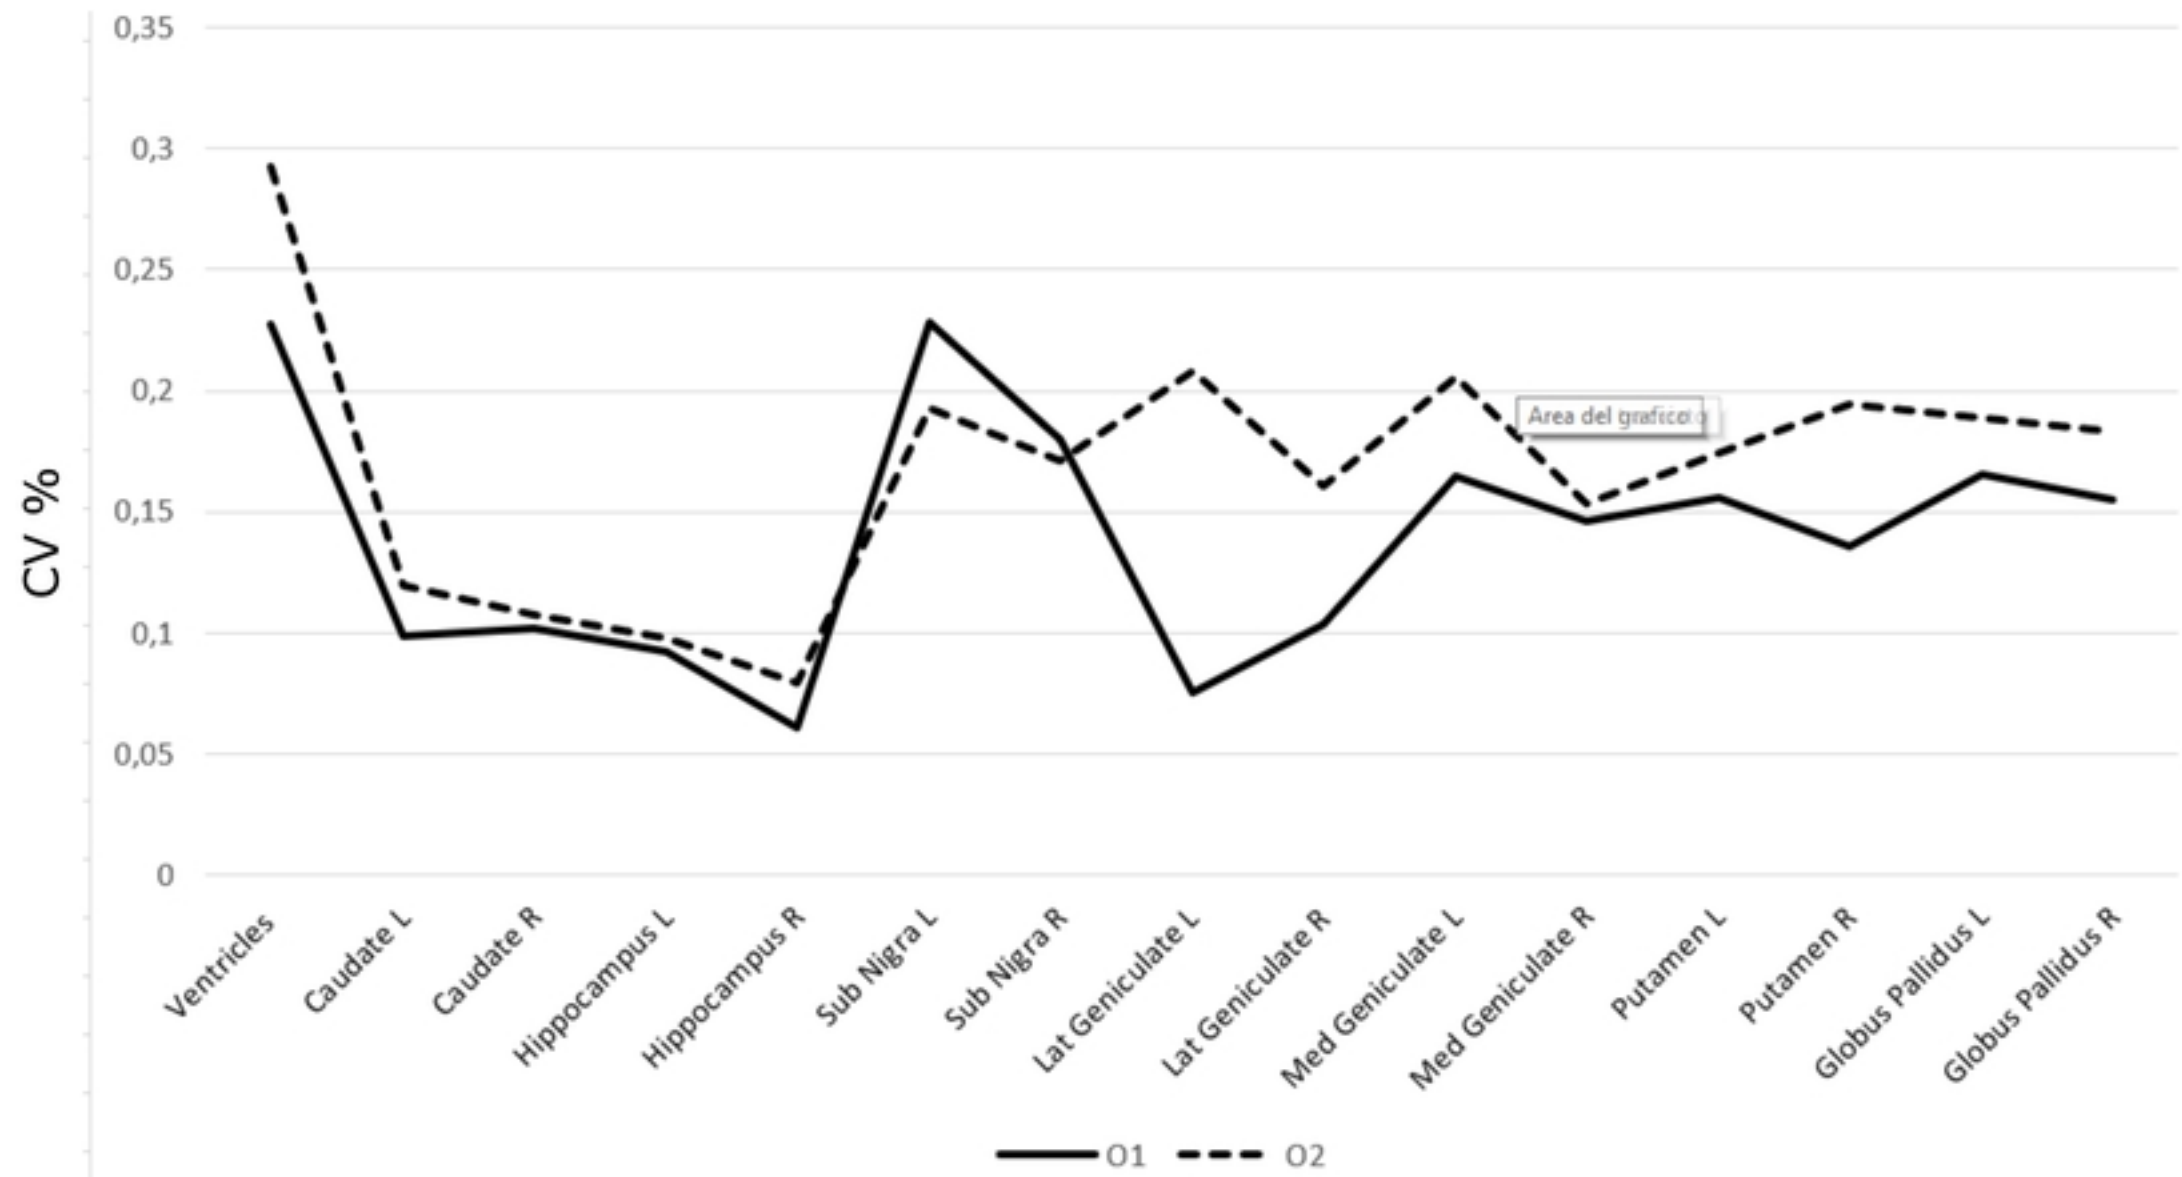

Figure 1

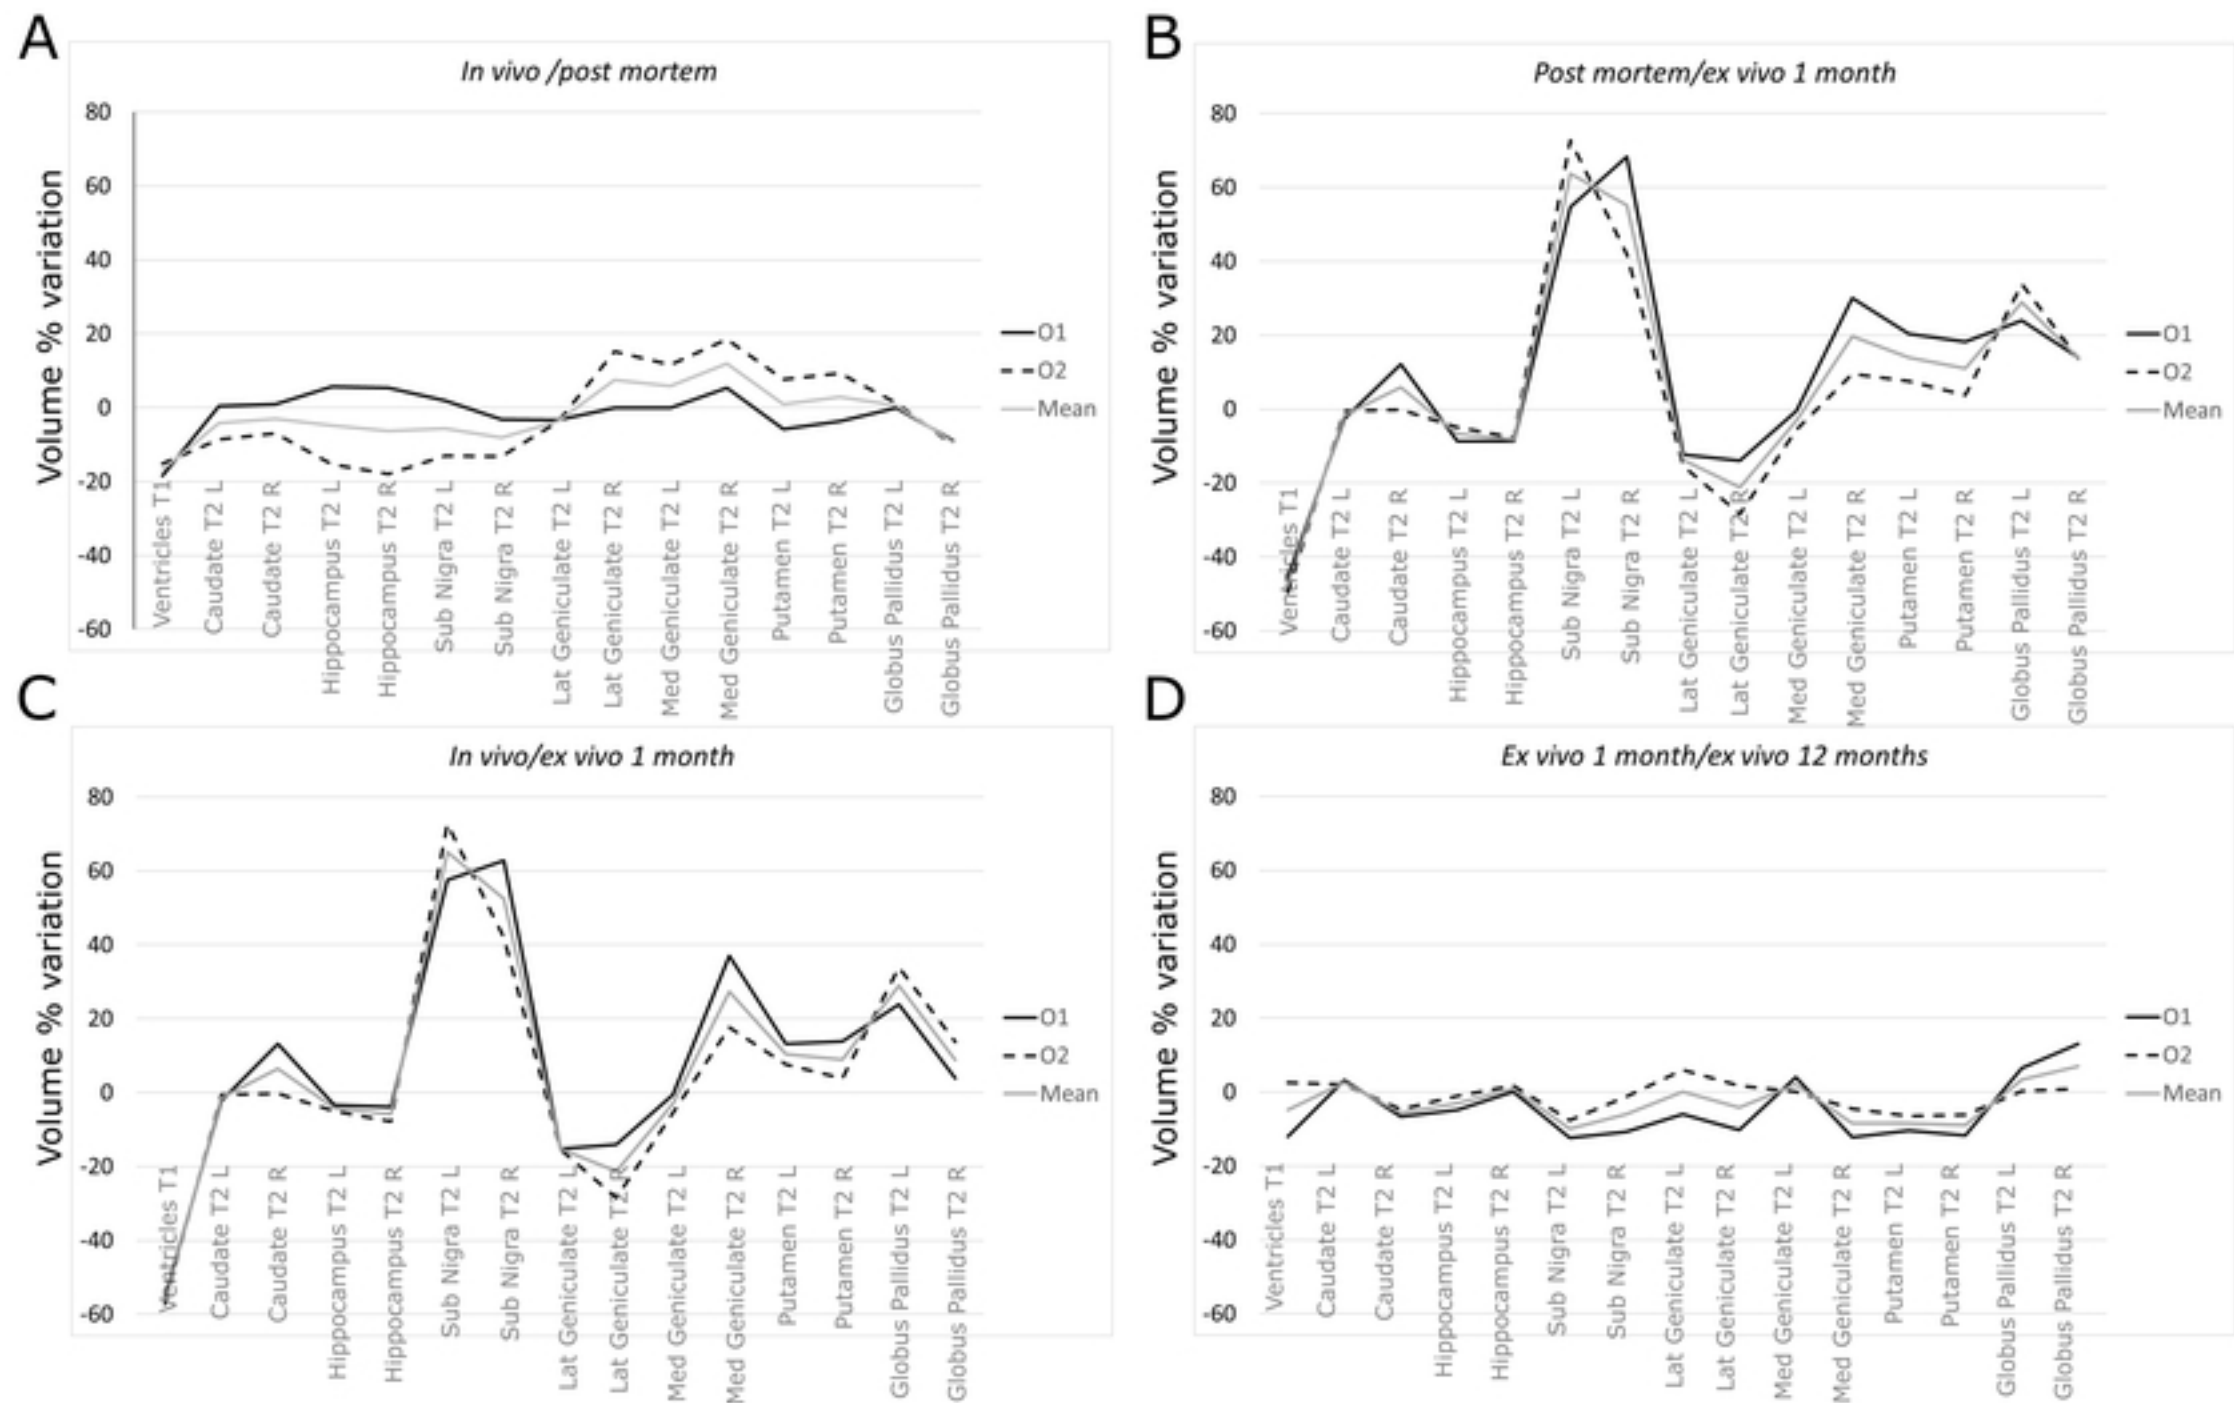

Figure 5

**Brain MRI T1w In-Vivo**

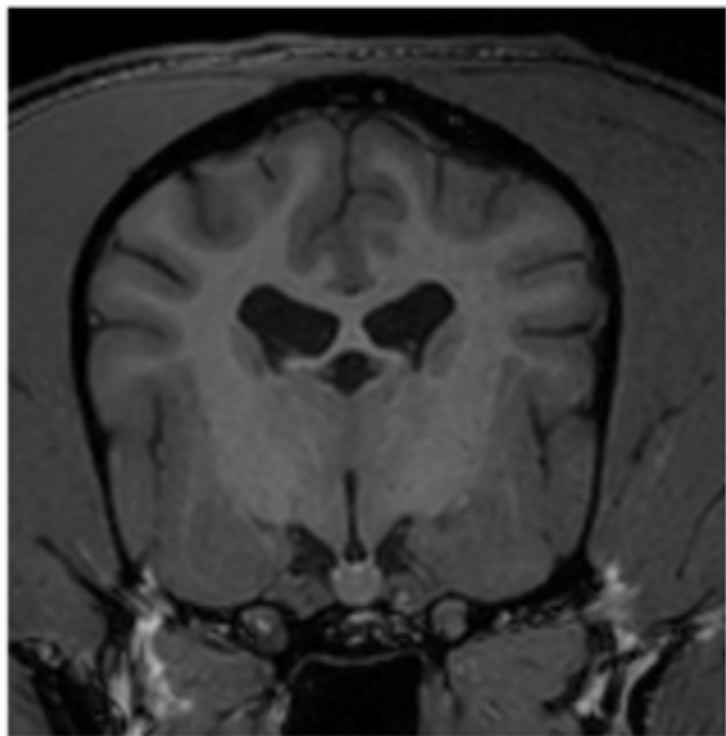

**Rigid Coregistration Overlay**

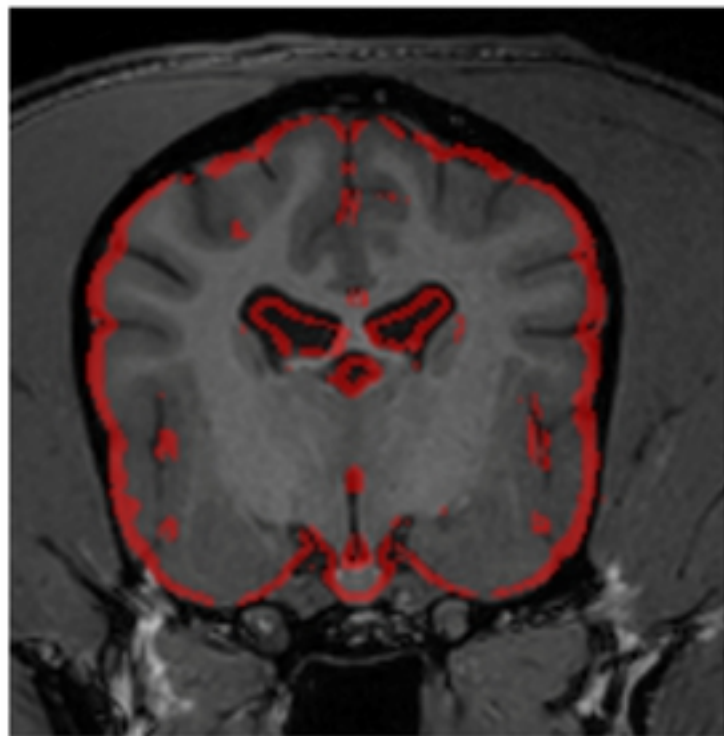

**Brain MRI T1w Ex-Vivo + EDGE (RED)**

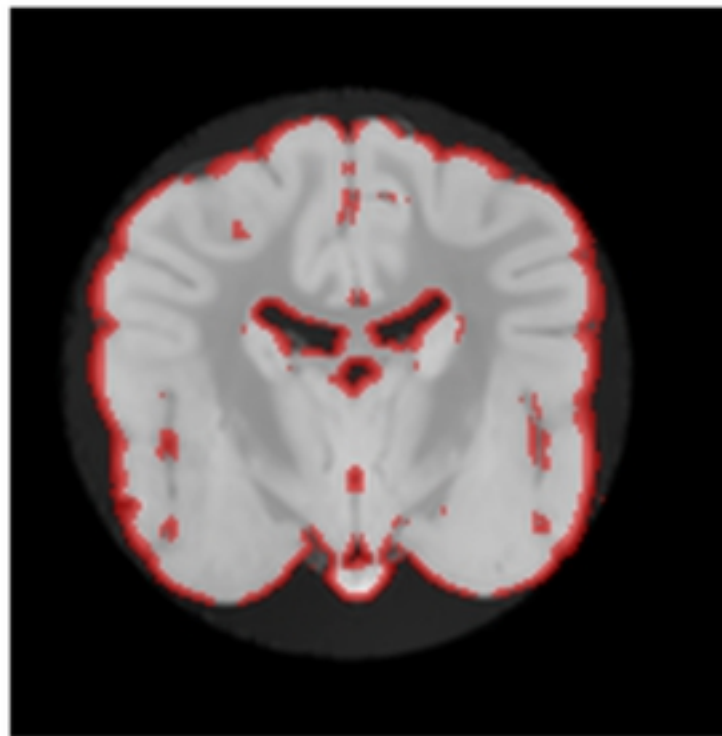

Figure 6

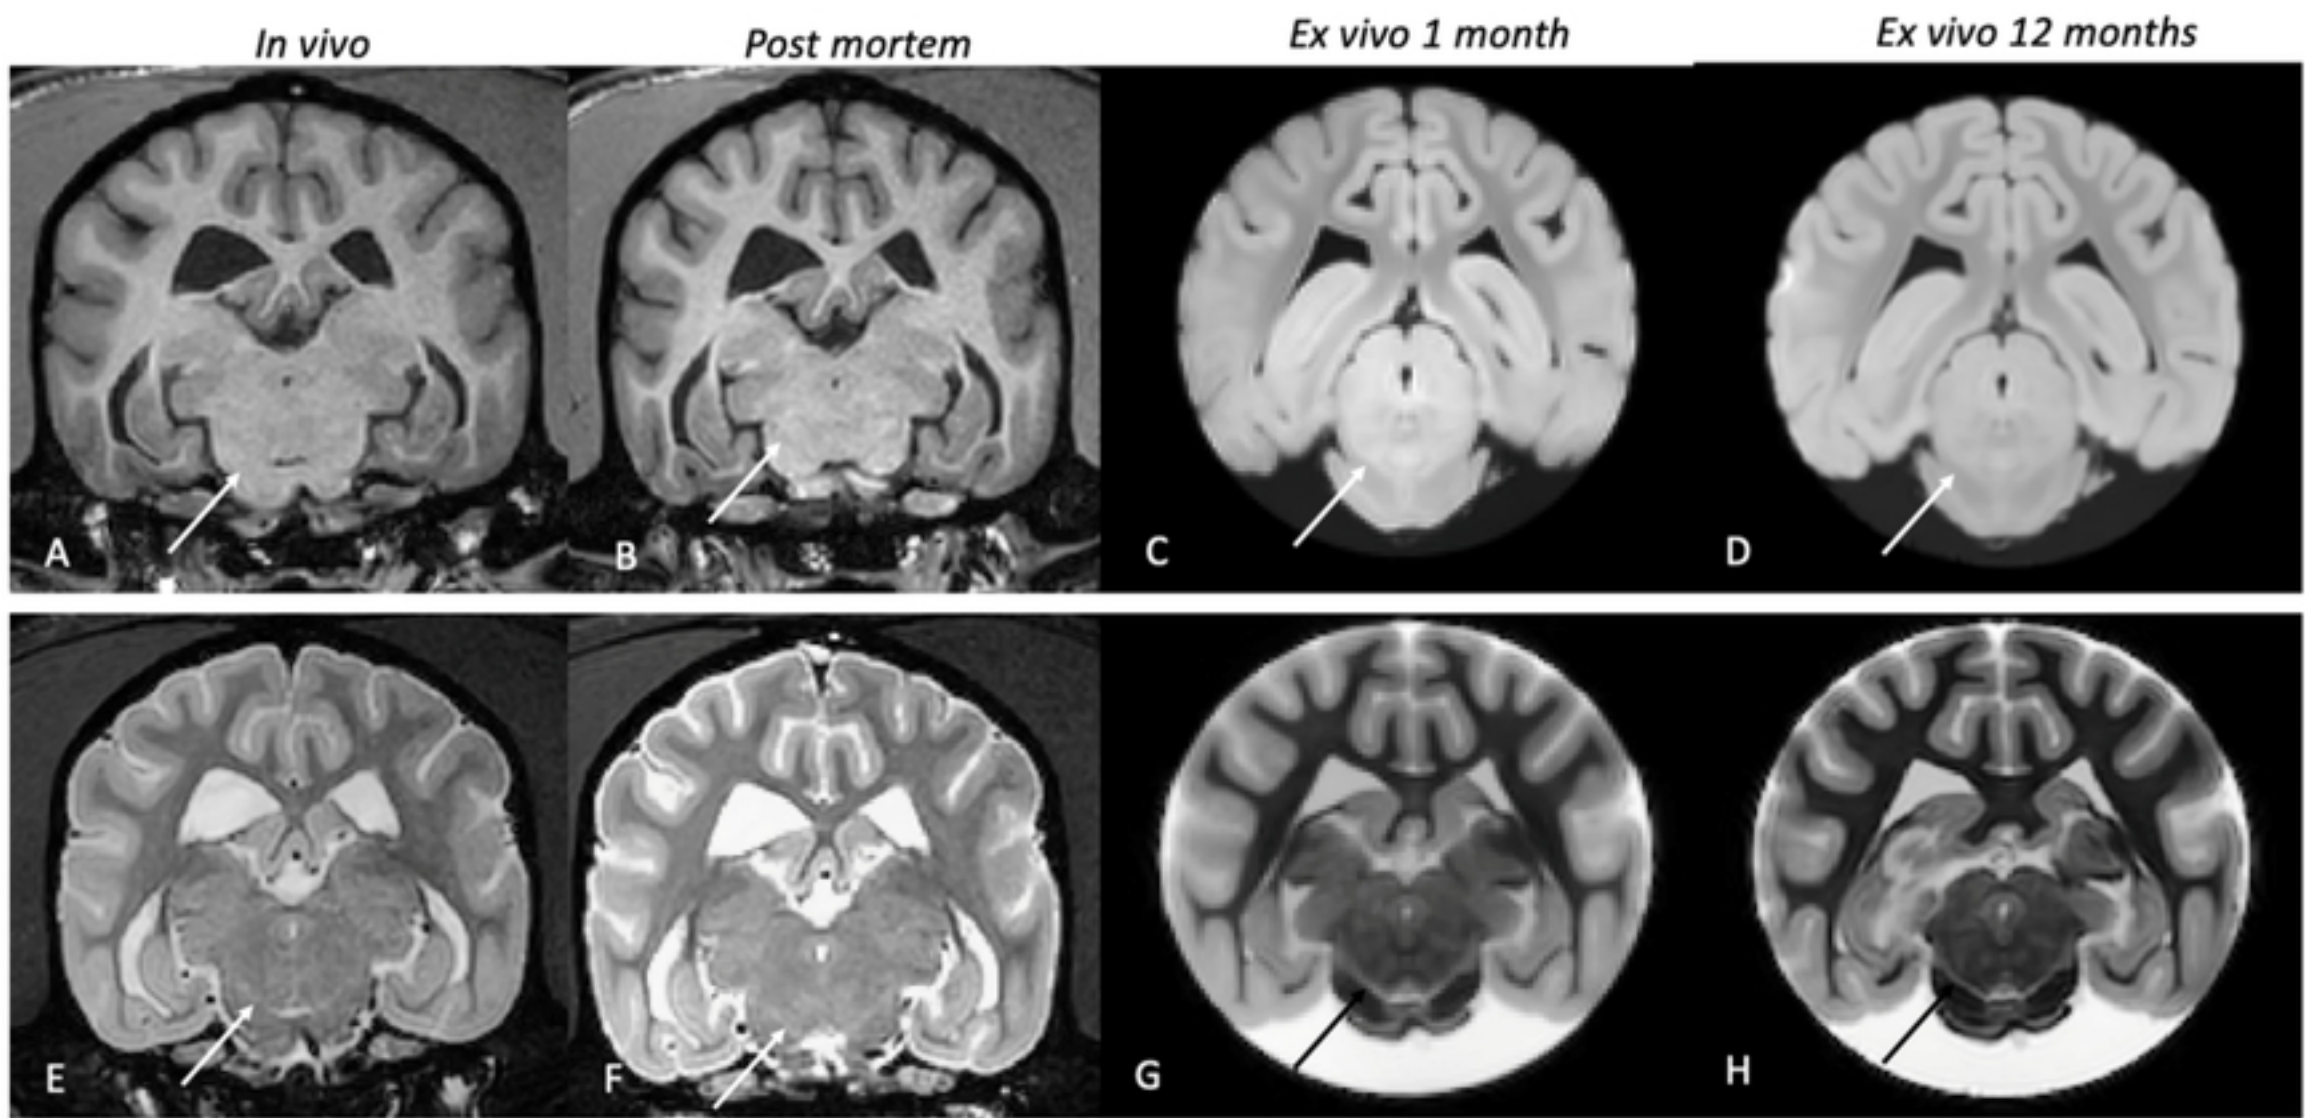

Figure 4

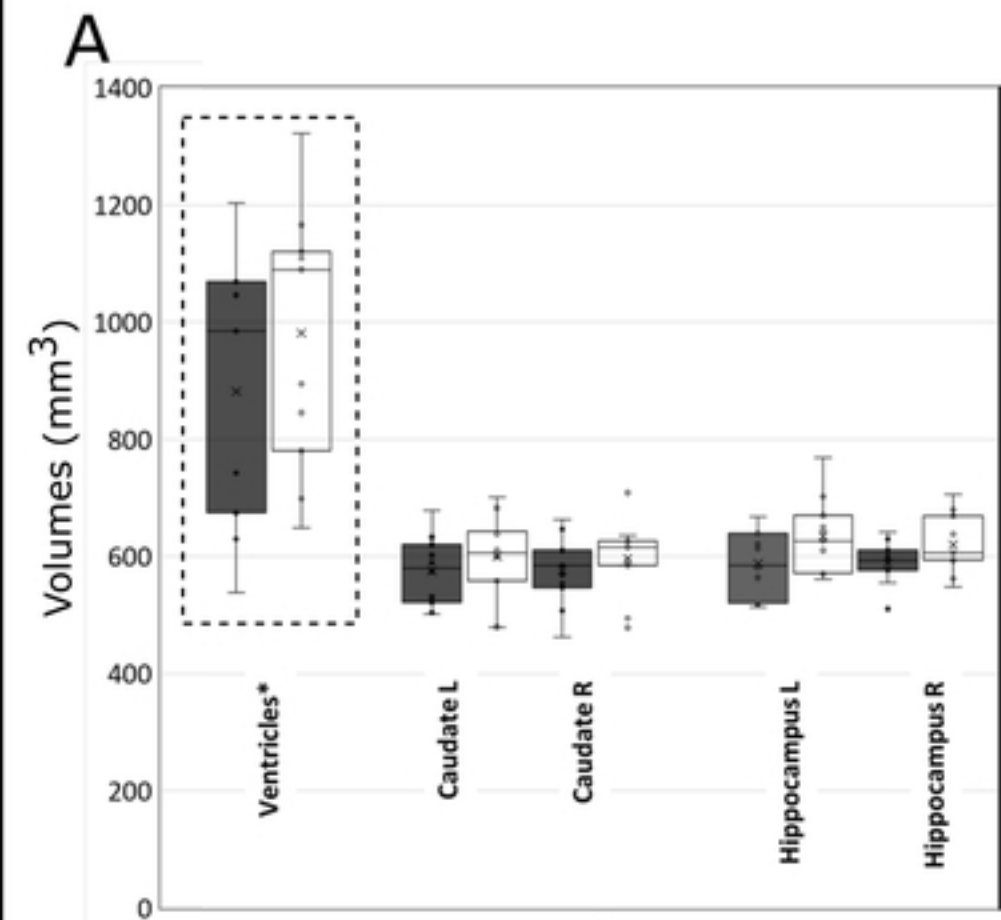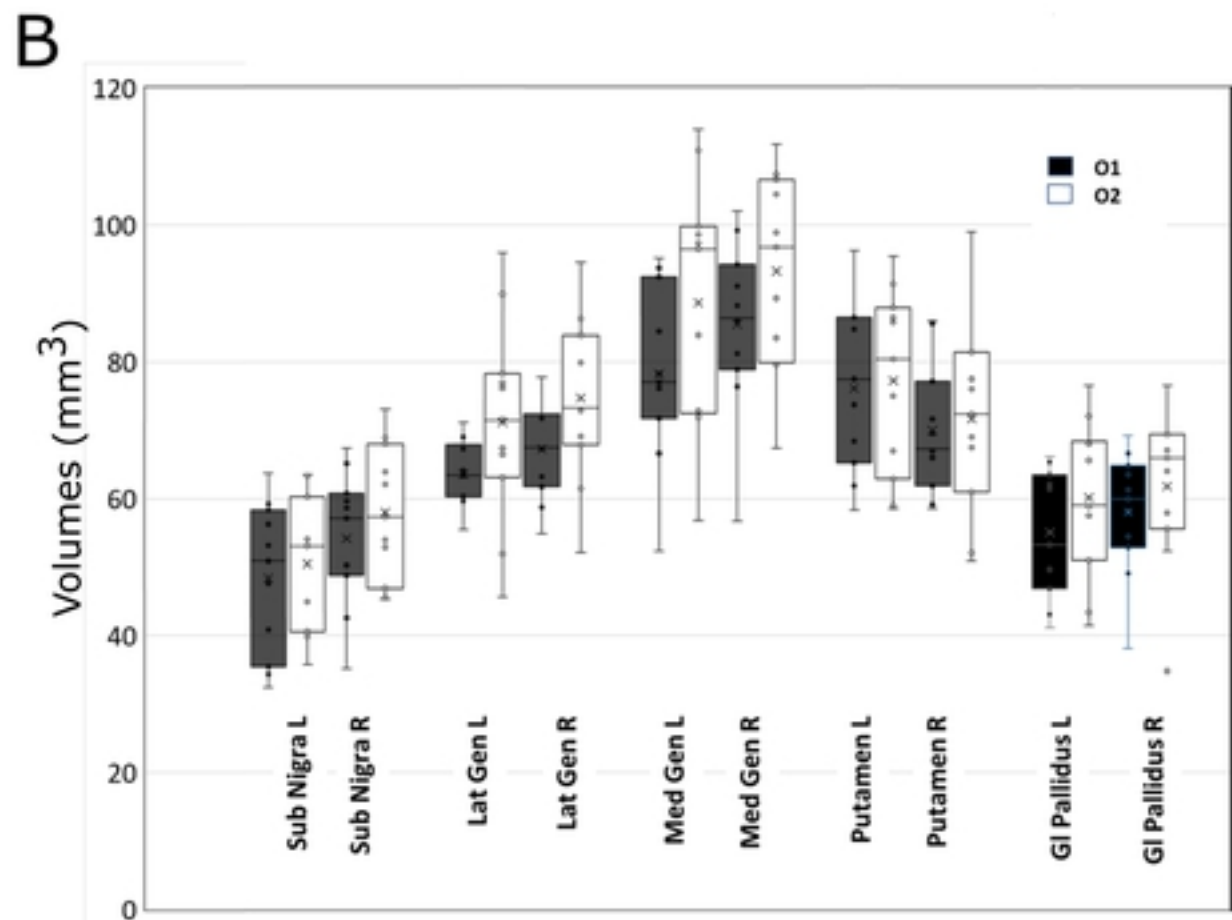

Figure 3



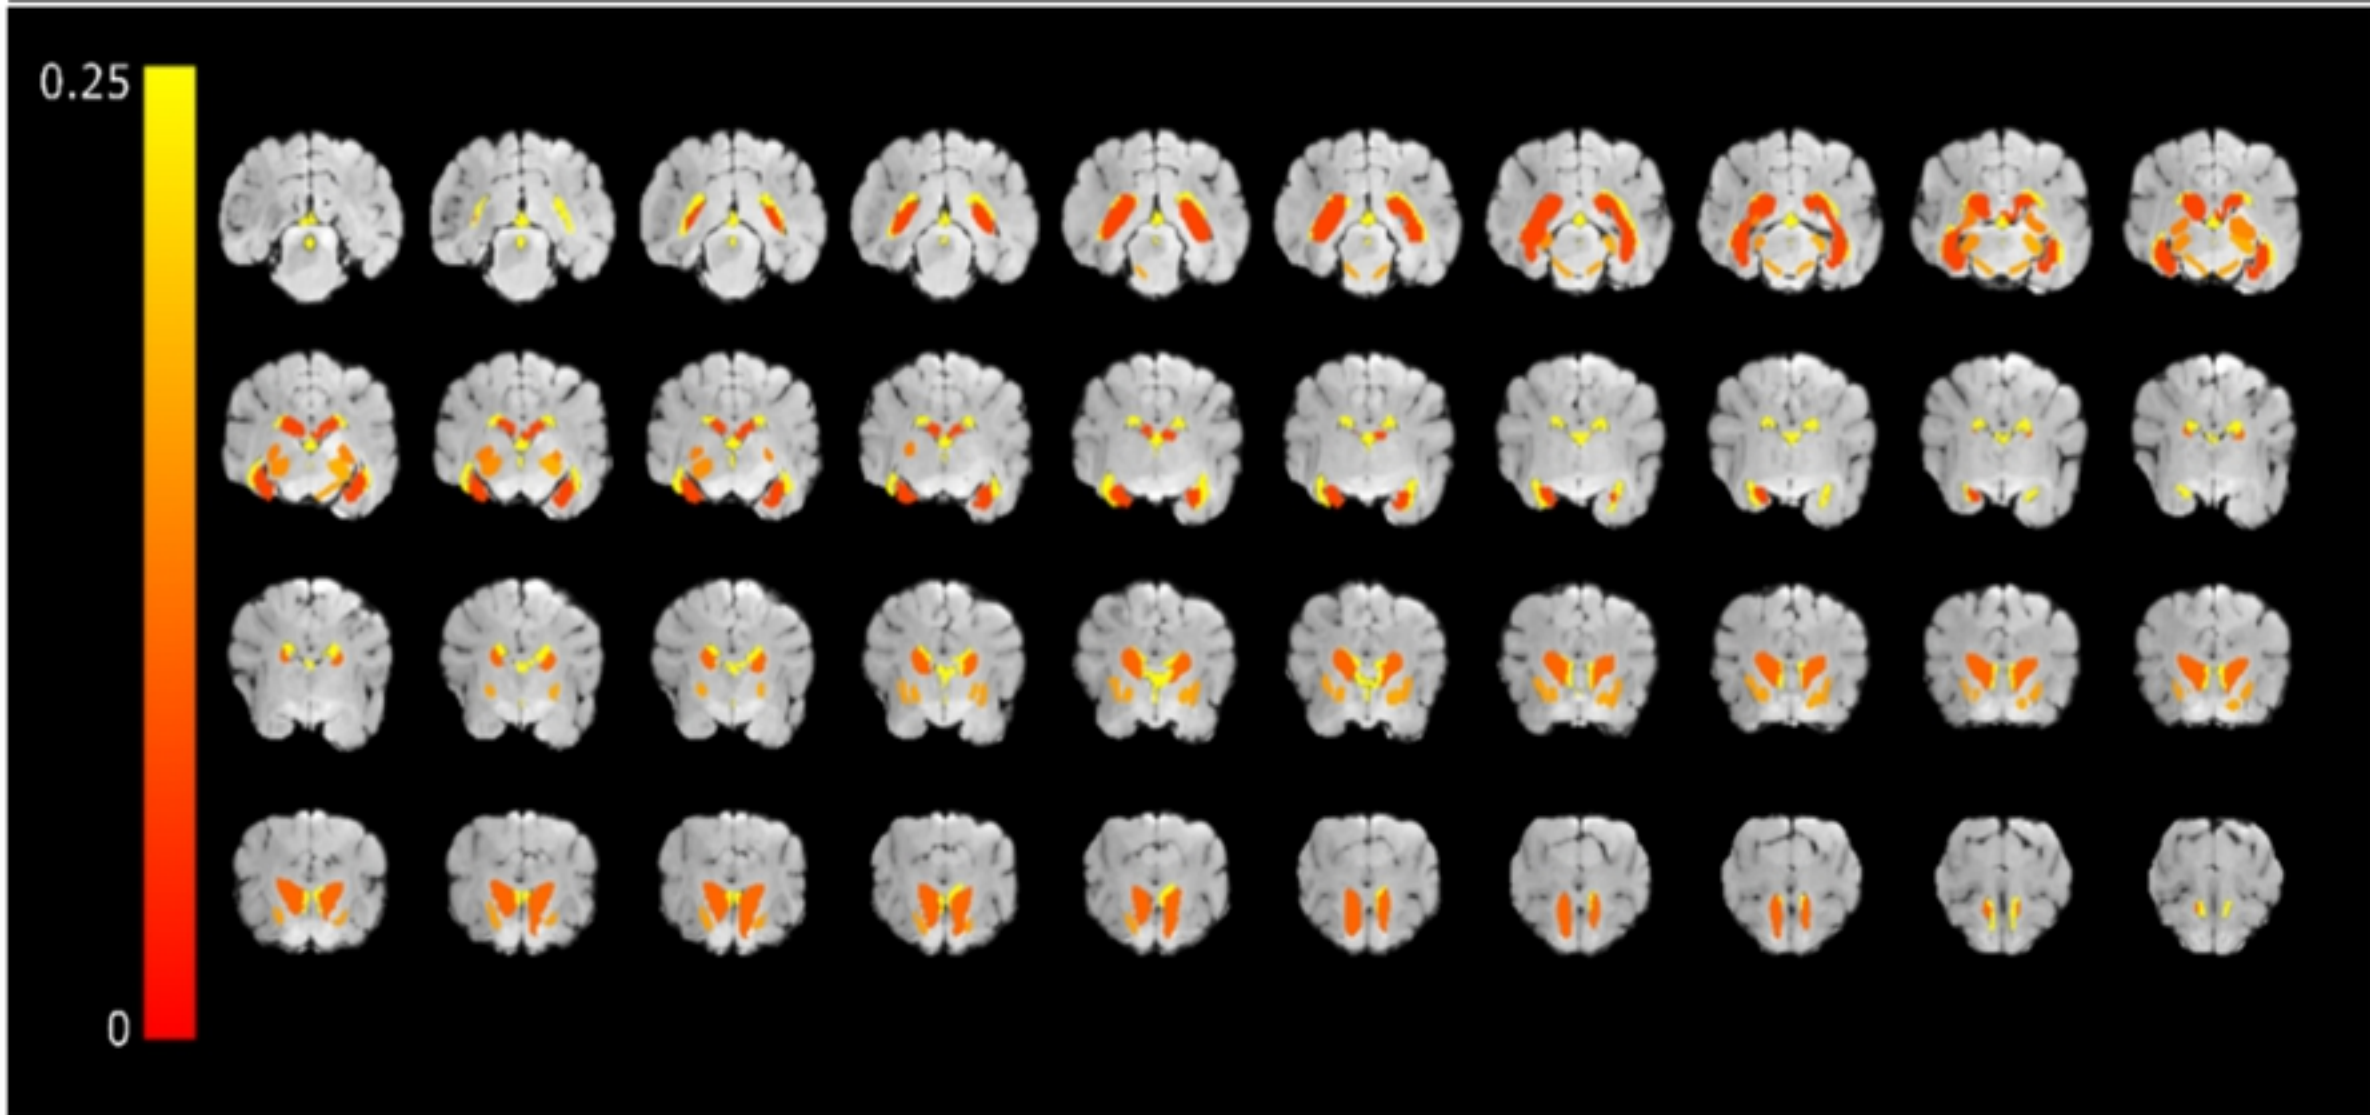

Figure 2
